# Supplementary material for: Italian validation of the short form of the Pelvic Organ Prolapse/Urinary Incontinence Sexual Questionnaire (PISQ-12)
Source: PubMed Central journal article supplement (PMC9569287; doi:10.1007/s00192-022-05235-0), 2022-06-01
Supplement: 192_2022_5235_MOESM2_ESM.pdf [file 192_2022_5235_MOESM2_ESM.pdf]

## Supplementary Material 2

Cohen's kappa values for single items

|                                |      |
|--------------------------------|------|
| #1 (behavioral-emotive domain) | 0.63 |
| #2 (behavioral-emotive domain) | 0.79 |
| #3 (behavioral-emotive domain) | 0.71 |
| #4 (behavioral-emotive domain) | 0.63 |
| #5 (physical domain)           | 0.68 |
| #6 (physical domain)           | 0.76 |
| #7 (physical domain)           | 0.66 |
| #8 (physical domain)           | 0.72 |
| #9 (physical domain)           | 0.69 |
| #10 (partner-related domain)   | 0.80 |
| #11 (partner-related domain)   | 0.63 |
| #12 (partner-related domain)   | 0.59 |
